# Supplementary material
Source: Elsevier journal article supplement (https://comptes-rendus.academie-sciences.fr/chimie/article/10.1016/j.crci.2015.07.003/file/attach/mmc1.pdf)
Supplement: mmc1 [file mmc1.pdf]

## Supporting information

|                                                                                                                                                                                                                                                        |    |
|--------------------------------------------------------------------------------------------------------------------------------------------------------------------------------------------------------------------------------------------------------|----|
| SYNTHESIS.....                                                                                                                                                                                                                                         | S2 |
| Synthesis of homooligourea <b>5</b> .....                                                                                                                                                                                                              | S2 |
| Synthesis of $\alpha$ -heptapeptide <b>6</b> on solid support .....                                                                                                                                                                                    | S2 |
| <b>Scheme S1</b> : Synthesis of peptide <b>6</b> on solid support using microwave irradiation. ....                                                                                                                                                    | S2 |
| ADDITIONAL $^1\text{H}$ -NMR DATA.....                                                                                                                                                                                                                 | S3 |
| <b>Figure S1</b> . Amide NH resonances in the $^1\text{H}$ NMR spectrum of chimera 14-mer <b>1</b> recorded at 700 MHz in $\text{CD}_3\text{OH}$ . Reported $^3J(\text{NH}, \alpha\text{CH})$ values for $\alpha$ -amino acid residues are in Hz. .... | S3 |
| <b>Figure S2</b> . $^1\text{H}, ^{15}\text{N}$ -HSQC spectrum of <b>1</b> recorded at 700 MHz in $\text{CD}_3\text{OH}$ . ....                                                                                                                         | S4 |
| <b>Figure S3</b> . Amide NH resonances in the $^1\text{H}$ NMR spectrum of chimera 13-mer <b>2</b> recorded at 700 MHz in $\text{CD}_3\text{OH}$ . Reported $^3J(\text{NH}, \alpha\text{CH})$ values for $\alpha$ -amino acid residues are in Hz. .... | S5 |
| <b>Figure S4</b> . $^1\text{H}, ^{15}\text{N}$ -HSQC spectrum of <b>2</b> recorded at 700 MHz in $\text{CD}_3\text{OH}$ . ....                                                                                                                         | S6 |
| <b>Table S1</b> : $^3J(\text{NH}, ^\beta\text{CH})$ coupling constants (in Hertz) for ethylene diamine residues in the oligourea domains of chimera <b>1</b> in $\text{CD}_3\text{OH}$ (700 MHz) at 4 mM .....                                         | S6 |
| <b>Table S2</b> : $^3J(\text{NH}, ^\beta\text{CH})$ coupling constants (in Hertz) for ethylene diamine residues in the oligourea domains of chimera <b>2</b> in $\text{CD}_3\text{OH}$ (700 MHz) at 4 mM .....                                         | S6 |
| CIRCULAR DICHROISM.....                                                                                                                                                                                                                                | S7 |
| <b>Figure S5</b> : CD spectra of chimera <b>2</b> in MeOH, oligourea <b>5</b> in MeOH and peptide <b>6</b> in MeOH and TFE, all recorded at 20°C at 0.05mM. ....                                                                                       | S7 |
| <b>Table S3</b> : Molar ellipticity values at 222 nm for chimera <b>2</b> , oligourea <b>5</b> and peptide <b>6</b> (0.05mM). ....                                                                                                                     | S7 |
| <b>Figure S6</b> : CD spectra of chimera <b>1</b> and oligourea <b>5</b> recorded at 20°C in MeOH at 0.05mM. ....                                                                                                                                      | S8 |

# SYNTHESIS

## Synthesis of homooligourea 5

### **Boc-Val<sup>u</sup>-Ala<sup>u</sup>-Leu<sup>u</sup>-Val<sup>u</sup>-Ala<sup>u</sup>-Leu<sup>u</sup>-NH<sub>2</sub> (5)**

The synthesis of model homooligourea **5** was previously described<sup>1</sup>.

## Synthesis of $\alpha$ -heptapeptide 6 on solid support

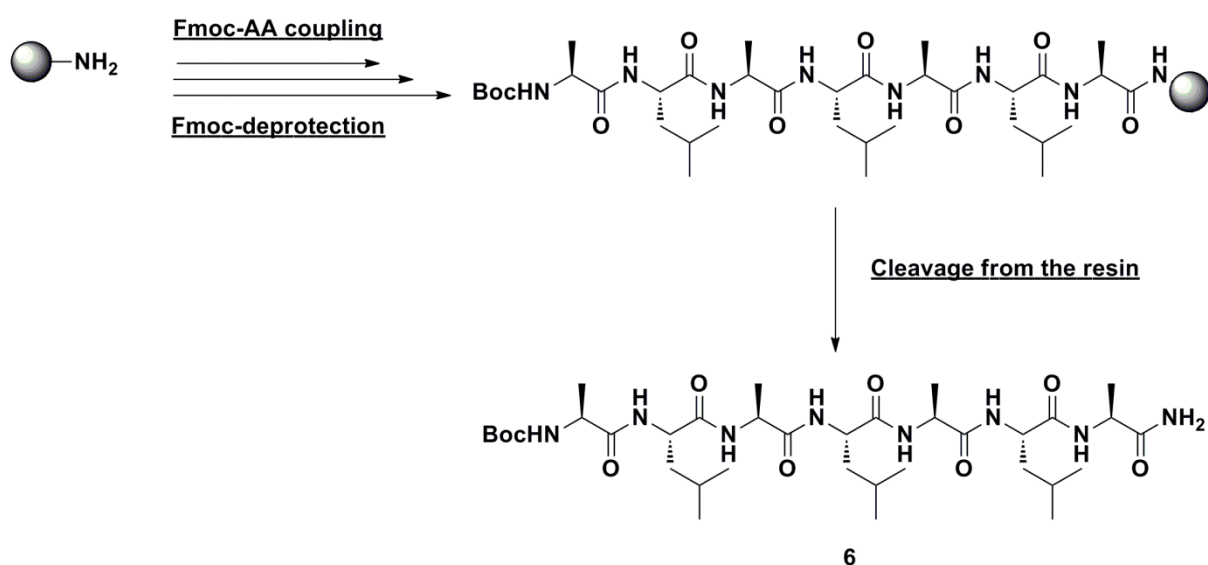

**Scheme S1** : Synthesis of peptide **6** on solid support using microwave irradiation.

### **Boc-Ala-Leu-Ala-Leu-Ala-Leu-Ala-NH<sub>2</sub> (6)**

**6** was synthesized according to GP1, GP2 and GP5, starting from Sieber resin (162mg, 0.10 mmol, loading: 0.62mmol/g) and Fmoc- $\alpha$ -AA (0.40 mmol, 4eq relative to the resin loading). The final product **6** was purified by semi preparative HPLC. 2 mg were obtained with total yield of 4%. **ESI-MS** ( $M_w$  740.93)  $m/z$  741.20  $[\text{M} + \text{H}]^+$ , 763.53  $[\text{M} + \text{Na}]^+$ ; **HPLC** ( $\text{H}_2\text{O}$  (0.1% TFA), MeOH (0.1% TFA); gradient 50-100%, 5 min; 100%, 5min)  $t_R = 5.74$  min.

<sup>1</sup> Y. R. Nelli, S. Antunes, A. Salaün, E. Thinon, S. Massip, B. Kauffmann, C. Douat, G. Guichard, *Chem. Eur. J.* **2015**, *21*, 2870-2880.

## ADDITIONAL $^1\text{H}$ -NMR DATA

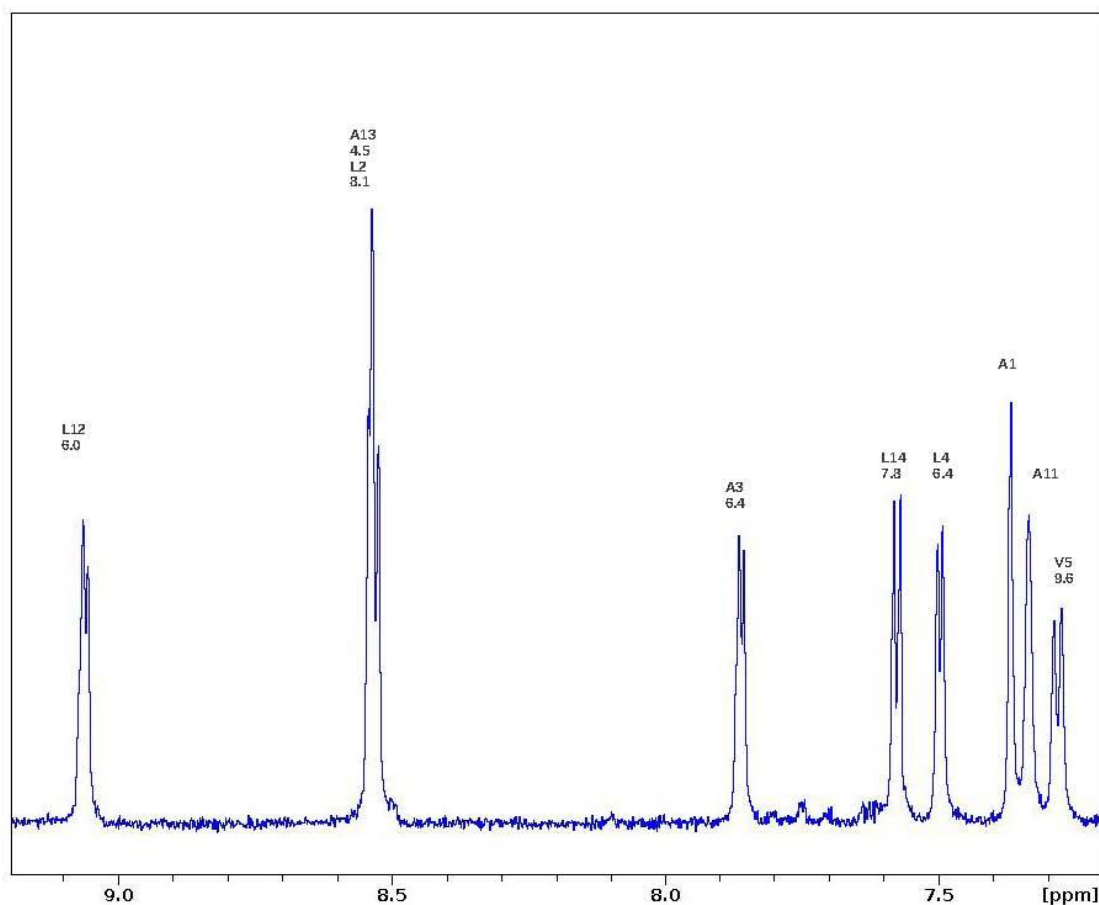

**Figure S1.** Amide NH resonances in the  $^1\text{H}$  NMR spectrum of chimera 14-mer **1** recorded at 700 MHz in  $\text{CD}_3\text{OH}$ . Reported  $^3\text{J}(\text{NH}, \alpha\text{CH})$  values for  $\alpha$ -amino acid residues are in Hz.

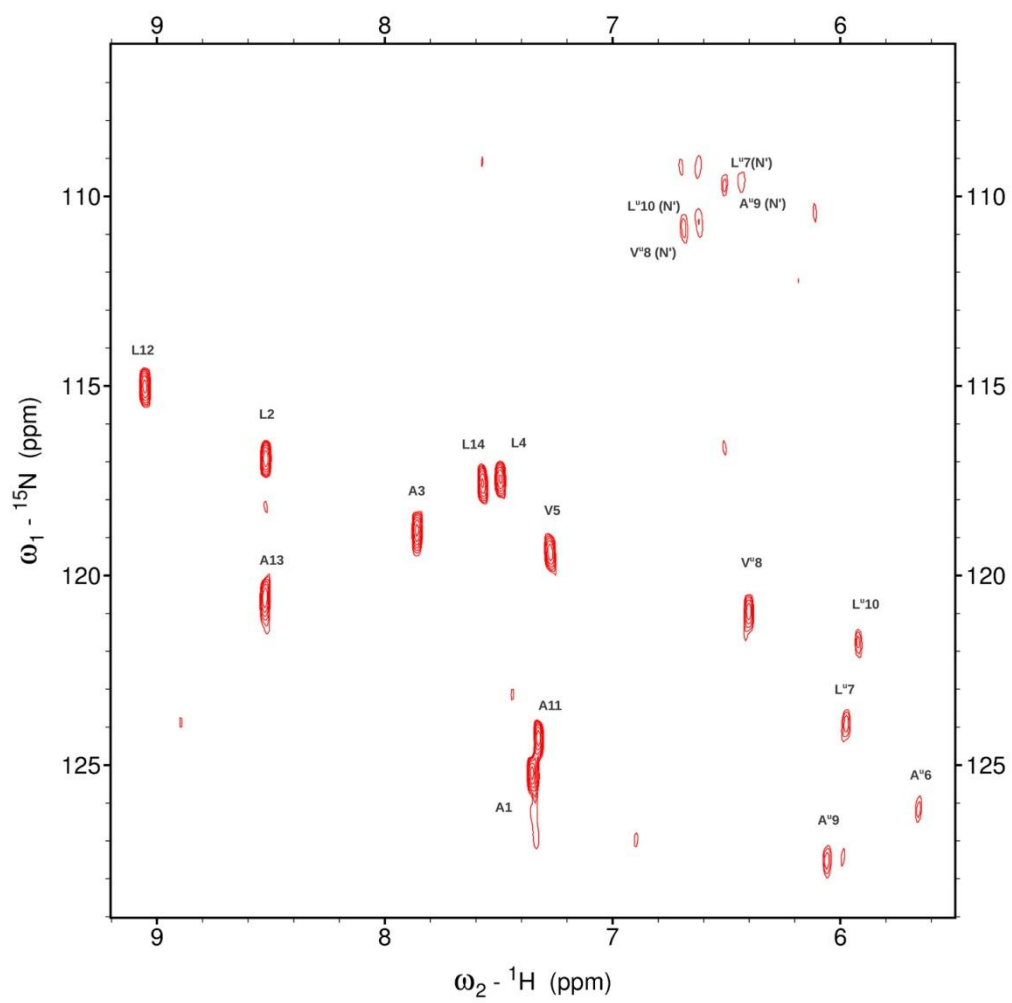

**Figure S2.**  $^1\text{H}$ ,  $^{15}\text{N}$ -HSQC spectrum of **1** recorded at 700 MHz in  $\text{CD}_3\text{OH}$ .

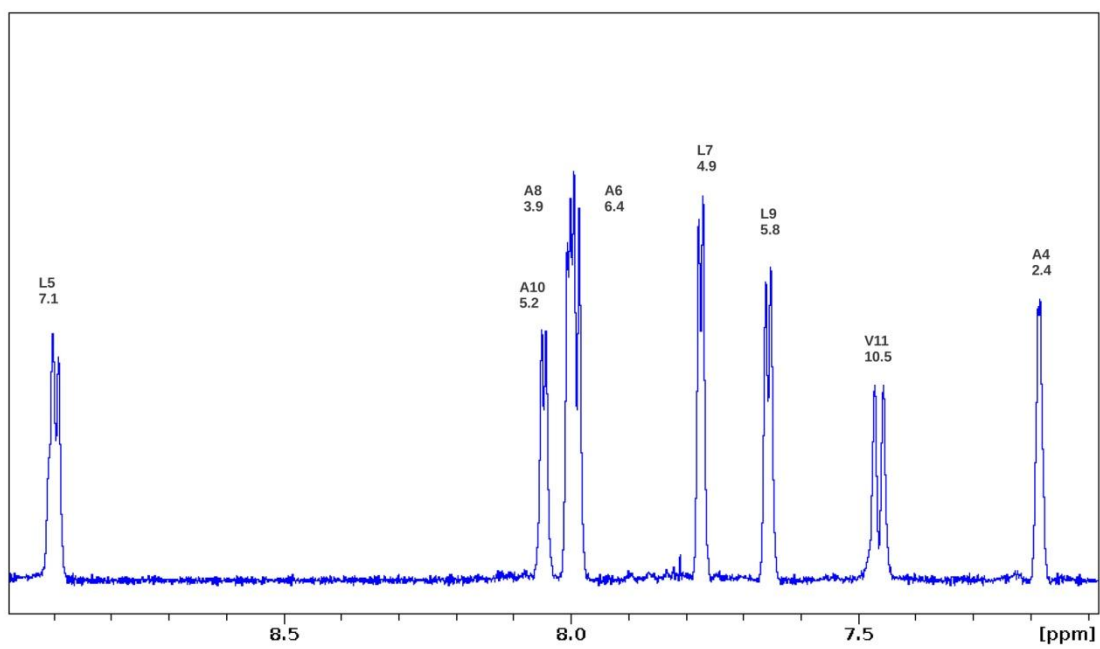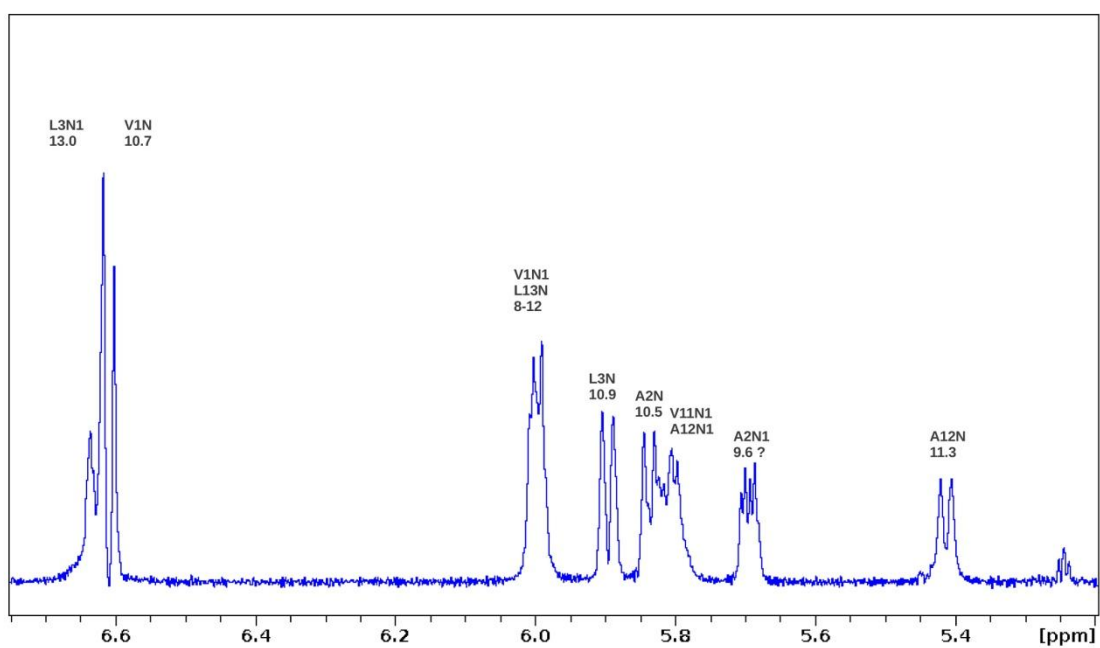

**Figure S3.** Amide NH resonances in the  $^1\text{H}$  NMR spectrum of chimera 13-mer **2** recorded at 700 MHz in  $\text{CD}_3\text{OH}$ . Reported  $^3\text{J}(\text{NH}, \alpha\text{CH})$  values for  $\alpha$ -amino acid residues are in Hz.

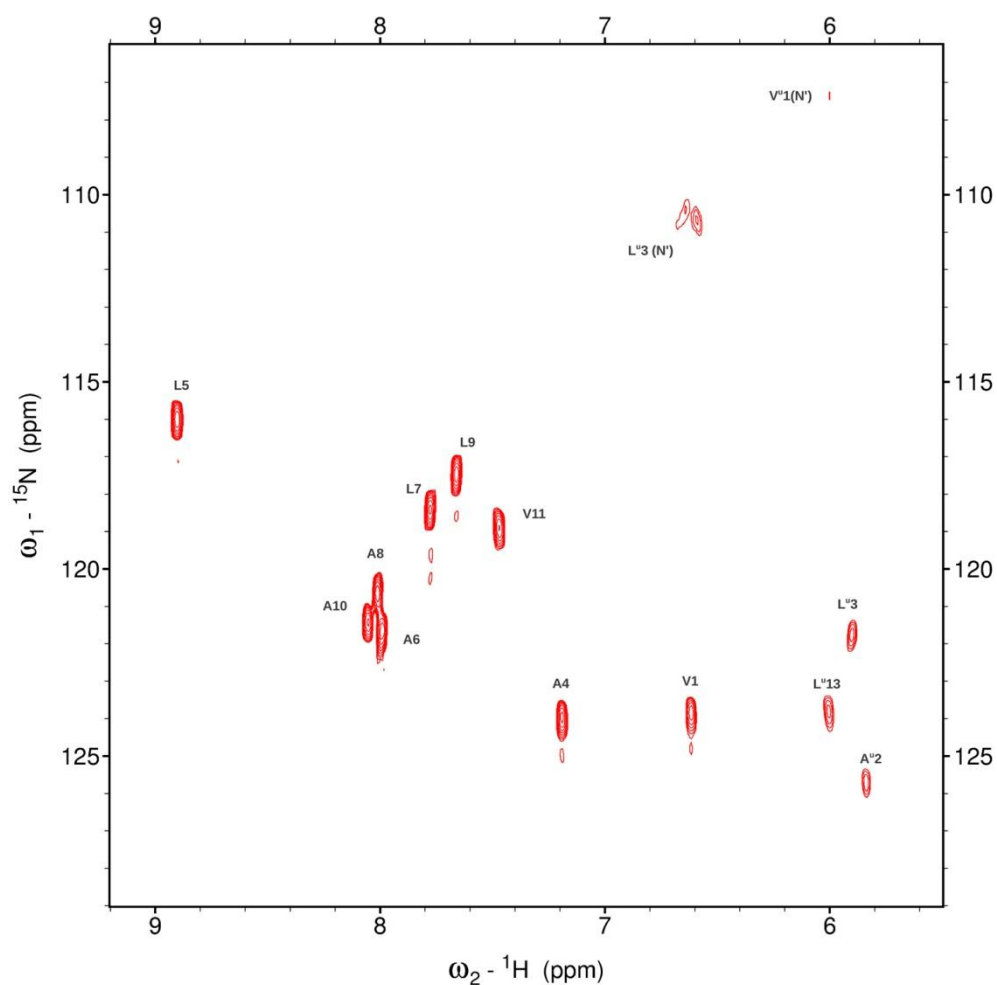

**Figure S4.**  $^1\text{H}$ ,  $^{15}\text{N}$ -HSQC spectrum of **2** recorded at 700 MHz in  $\text{CD}_3\text{OH}$ .

**Table S1 :**  $^3J(\text{NH}, ^\beta\text{CH})$  coupling constants (in Hertz) for ethylene diamine residues in the oligoureia domains of chimera **1** in  $\text{CD}_3\text{OH}$  (700 MHz) at 4 mM

| Compd    | Solvent                | peptide     | Val <sup>u</sup> | Ala <sup>u</sup> | Leu <sup>u</sup> | Val <sup>u</sup> | Ala <sup>u</sup> | Leu <sup>u</sup> | peptide                 |
|----------|------------------------|-------------|------------------|------------------|------------------|------------------|------------------|------------------|-------------------------|
| <b>1</b> | $\text{CD}_3\text{OH}$ | Boc-A-L-A-L | 9.6              | 11.5             | 12.5             | 12.3             | 10.7             | 12.1             | A-L-A-L-NH <sub>2</sub> |

**Table S2 :**  $^3J(\text{NH}, ^\beta\text{CH})$  coupling constants (in Hertz) for ethylene diamine residues in the oligoureia domains of chimera **2** in  $\text{CD}_3\text{OH}$  (700 MHz) at 4 mM

| Compd    | Solvent                | Boc-Val <sup>u</sup> | Ala <sup>u</sup> | Leu <sup>u</sup> | peptide       | Val <sup>u</sup> | Ala <sup>u</sup> | Leu <sup>u</sup> -NH <sub>2</sub> |
|----------|------------------------|----------------------|------------------|------------------|---------------|------------------|------------------|-----------------------------------|
| <b>2</b> | $\text{CD}_3\text{OH}$ | 10.7                 | 9.6              | 10.9             | A-L-A-L-A-L-A | 10.5             | 11.3             | ND                                |

## Circular dichroism

All CD spectra were recorded on a J-815 Jasco dichrographe (Jasco France, Nantes, France). Electronic Circular dichroism (ECD) spectra of chimeras **1** and **2**, oligourea **5** and heptapeptide **6** and were acquired between 300 and 180 nm at a concentration of 0.05 mM in MeOH or TFE using a quartz cell with a path length of 5 mm. Sample temperature was regulated at 20°C. Data were collected in continuous scan mode with a data pitch of 0.1 nm, a scanning speed of 50 nm.min<sup>-1</sup>, 2 nm bandwidth and 2 accumulations per sample. Sample Data were collected as raw ellipticity ( $\psi$  in mdeg) and converted to molar ellipticity  $[\theta]$  in deg.cm<sup>2</sup>.dmol<sup>-1</sup> using the following equation:

$$[\theta] = \frac{\psi \times 10^{-3}}{l \times c}$$

Where  $l$  is the pathlength in cm, and  $c$  is the peptide concentration in dmol.cm<sup>-3</sup>

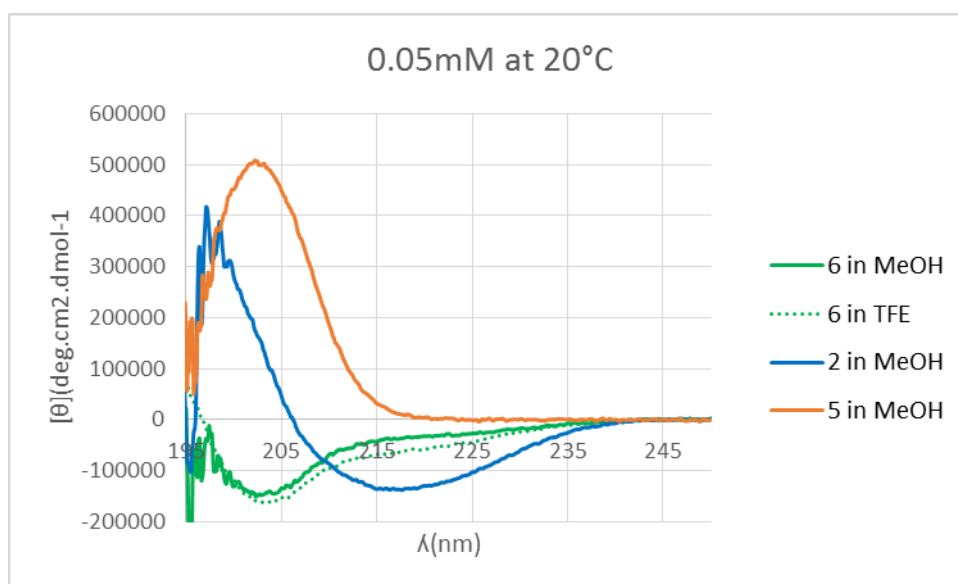

**Figure S5:** CD spectra of chimera **2** in MeOH, oligourea **5** in MeOH and peptide **6** in MeOH and TFE, all recorded at 20°C at 0.05mM.

**Table S3:** Molar ellipticity values at 222 nm for chimera **2**, oligourea **5** and peptide **6** (0.05mM).

|         |             | <b>5</b>                                              | <b>2</b>                                              | <b>6</b>                                              |
|---------|-------------|-------------------------------------------------------|-------------------------------------------------------|-------------------------------------------------------|
| Solvent | Temperature | $[\theta]$ (deg.cm <sup>2</sup> .dmol <sup>-1</sup> ) | $[\theta]$ (deg.cm <sup>2</sup> .dmol <sup>-1</sup> ) | $[\theta]$ (deg.cm <sup>2</sup> .dmol <sup>-1</sup> ) |
| MeOH    | 20°C        | 2 181                                                 | -123 526                                              | -31 267                                               |
| TFE     | 20°C        |                                                       |                                                       | -50 996                                               |

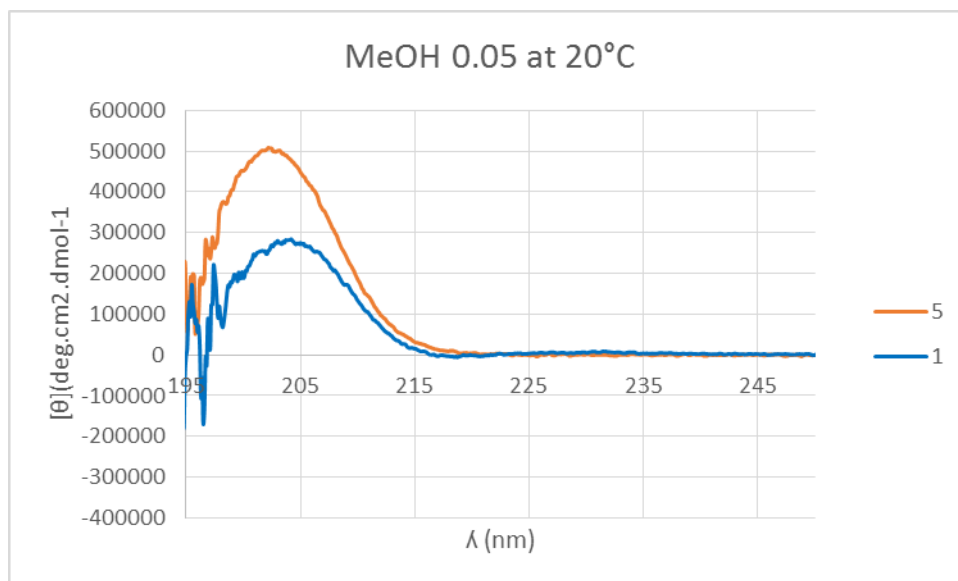

**Figure S6:** CD spectra of chimera **1** and oligourea **5** recorded at 20°C in MeOH at 0.05mM.
